# Supplementary material
Source: PubMed Central journal article supplement (PMC5869168)
Supplement: NIHMS951550-supplement-ESI.pdf [file NIHMS951550-supplement-ESI.pdf]

**SUPPLEMENTAL INFORMATION**

**Automated Flow Injection Method for the High Precision Determination  
of Drift Tube Ion Mobility Collision Cross Sections**

Charles M. Nichols, Jody C. May, Stacy D. Sherrod, John A. McLean\*

Department of Chemistry, Center for Innovative Technology, Vanderbilt Institute for Chemical Biology,  
Vanderbilt Institute for Integrative Biosystems Research and Education, Vanderbilt-Ingram Cancer  
Center, Vanderbilt University, Nashville, TN 37235-1822

\*Corresponding author e-mail: [john.a.mclean@vanderbilt.edu](mailto:john.a.mclean@vanderbilt.edu)

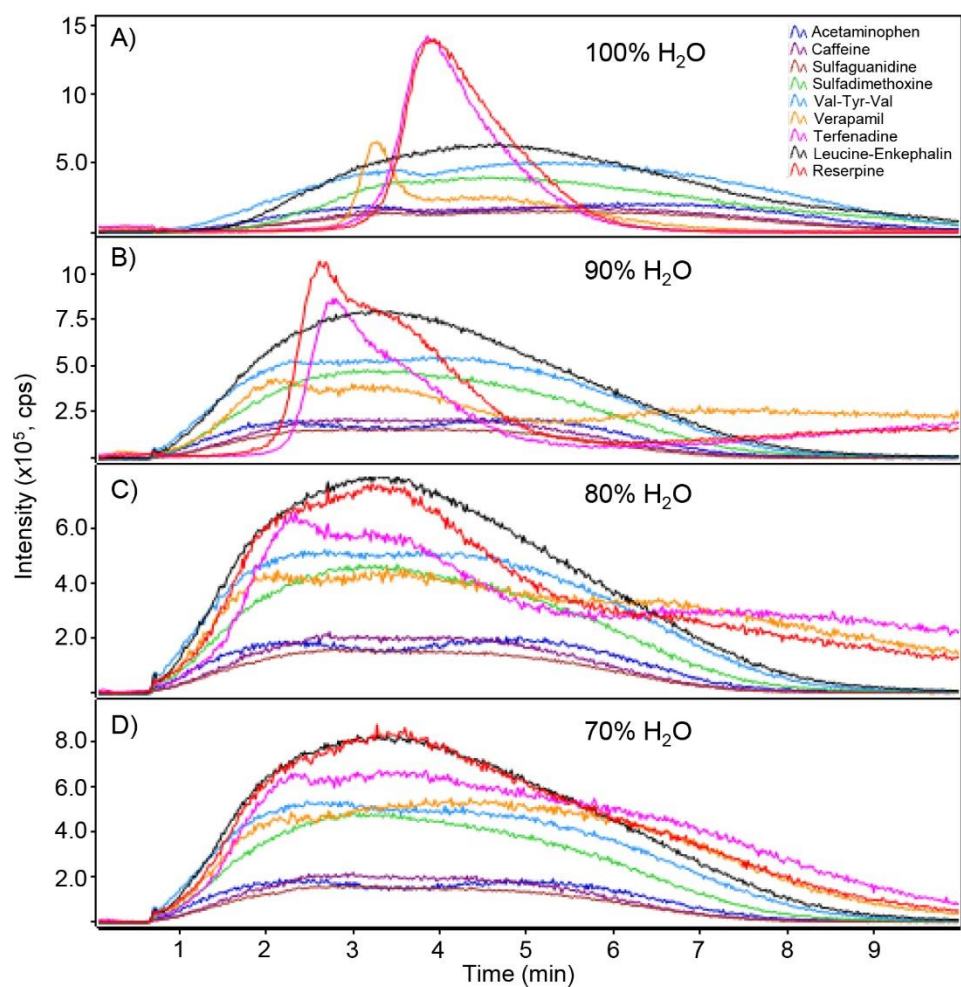

**Figure S1.** Extracted ion chromatograms illustrating the effects of solvent composition on FIA analyte elution shape. Mobile phase A and B are water and acetonitrile, respectively. A) 100% H<sub>2</sub>O. B) 90% H<sub>2</sub>O. C) 80% H<sub>2</sub>O. D) 70% H<sub>2</sub>O.

**Table S1.** Concentrations and commercial vendors of analyte.

| Analyte            | Conc.<br>( $\mu\text{g/mL}$ ) | Vendors       |
|--------------------|-------------------------------|---------------|
| Acetaminophen      | 10                            | Sigma-Aldrich |
| Caffeine           | 1.5                           | Sigma-Aldrich |
| Sulfaguanidine     | 5                             | Sigma-Aldrich |
| Sulfadimethoxine   | 1                             | Fluka         |
| Val-Tyr-Val        | 2.5                           | Sigma         |
| Verapamil          | 0.2                           | Sigma         |
| Terfenadine        | 0.2                           | Sigma         |
| Leucine-Enkephalin | 2.5                           | Sigma         |
| Reserpine          | 0.6                           | Sigma         |

The analytes were dissolved in 7:3 (water:acetonitrile) at the above concentrations. This mixture can also be purchased as a commercial sample (Part No. 186006963, Waters Corporation)

**Table S2.** Experiment time segment information for drift tube potentials

| Time Segment <sup>a</sup> | Advanced Parameters     |                         |                             |                            |
|---------------------------|-------------------------|-------------------------|-----------------------------|----------------------------|
|                           | DT Ent. V. <sup>b</sup> | DT Exit V. <sup>c</sup> | R. Funnel Ent. <sup>d</sup> | R.Funnel Exit <sup>e</sup> |
| 1.0                       | 1074                    | 224                     | 217.5                       | 217.5                      |
| 1.5                       | 1174                    | 224                     | 217.5                       | 217.5                      |
| 2.0                       | 1274                    | 224                     | 217.5                       | 217.5                      |
| 2.5                       | 1374                    | 224                     | 217.5                       | 217.5                      |
| 3.0                       | 1474                    | 224                     | 217.5                       | 217.5                      |
| 3.5                       | 1574                    | 224                     | 217.5                       | 217.5                      |
| 4.0                       | 1674                    | 224                     | 217.5                       | 217.5                      |

<sup>a</sup>Experimental time segment.

<sup>b</sup>Drift Tube Entrance potential.

<sup>c</sup>Drift Tube Exit potential.

<sup>d</sup>Rear Funnel Entrance potential.

<sup>e</sup>Rear Funnel Exit potential.

When using the “CCS Calculator (Multi-Field)” of IM-MS Browser (Agilent Technologies) to process the data, make sure that the “CCS Plot (Multi-Field)” captures all seven points of the method, otherwise the CCS will not be reproducible.

**Table S3.** Experimental LC flow rate timing.

| Binary Pump         |               |
|---------------------|---------------|
| Time                | Flow [mL/min] |
| 0.00                | 0.800         |
| 0.18                | 0.800         |
| 0.19                | 0.030         |
| Stoptime = 4.30 min |               |
| Posttime = 1.00 min |               |

**Table S4.** Experimental Source Conditions and Acquisition parameters for the measurements herein

| ESI Source Conditions |       |       | IM-QTOF Acquisition Parameters |       |             |
|-----------------------|-------|-------|--------------------------------|-------|-------------|
| Setting               | value | units | Setting                        | value | units       |
| Gas Temp              | 300   | °C    | Min Range                      | 100   | m/z         |
| Drying Gas            | 8     | l/min | Max Range                      | 1000  | m/z         |
| Nebulizer             | 35    | psig  | Frame Rate                     | 0.9   | Tran./Frame |
| Sheath Gas Temp       | 350   | °C    | Max Drift Time                 | 70    | ms          |
| Vcap                  | 3500  | V     | TOF Transient<br>Rate          | 751   | Transients  |
| Nozzle Voltage        | 800   | V     | Trap Fill Time                 | 20000 | μs          |
| Fragmentor            | 360   | V     | Trap Release Time              | 180   | μs          |
| Oct 1 RF Vpp          | 750   | V     |                                |       |             |

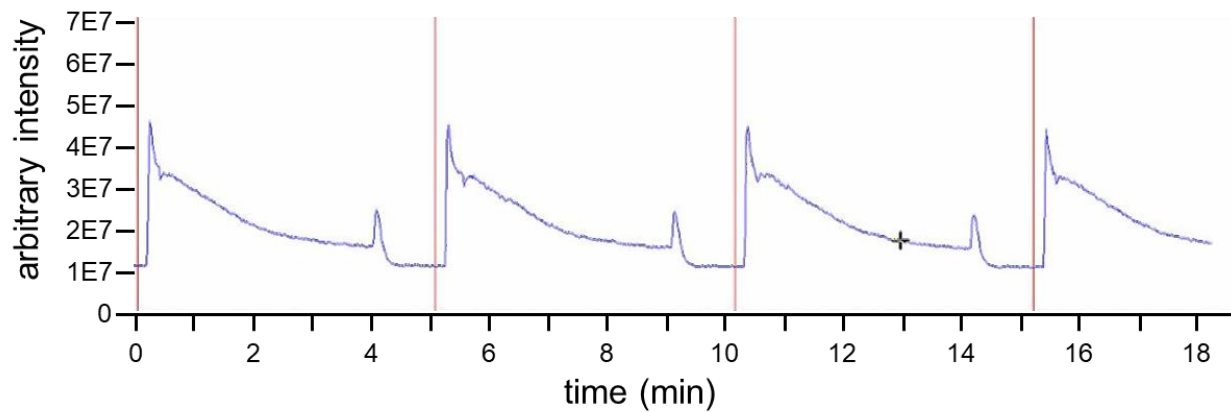

**Figure S2** – A composite total ion chromatogram of three contiguous sample injections illustrating the stacking of multiple CCS measurements in the FIA-DTIM-MS method.
